# Supplementary material for: Regulated Deficit Irrigation to Boost Processing Tomato Sustainability and Fruit Quality
Source: MDPI journal article supplement (doi:10.3390/su16093798), 2024-04-30
Supplement: s1 [file s1]

**Table S1.** Agronomic management of the open-field trial and soil characteristics of the upper soil layer (0-40 cm).

|                                                                        | 2019                               | 2020              |
|------------------------------------------------------------------------|------------------------------------|-------------------|
| GPS coordinates                                                        | 41°32'49.0704" N, 15°36'14.1192" E |                   |
| Transplanting date                                                     | 2 May, 2019                        | 18 May, 2020      |
| Plant density (p m <sup>-2</sup> )                                     |                                    | 2.78              |
| Harvesting date                                                        | 21 August, 2019                    | 3 September, 2020 |
| DAT harvesting (d)                                                     | 111                                | 108               |
| GDD harvesting (°C d)                                                  | 1346                               | 1409              |
| <b>Fertilization</b>                                                   |                                    |                   |
| N (kg ha <sup>-1</sup> )                                               | 123                                | 127               |
| P <sub>2</sub> O <sub>5</sub> (kg ha <sup>-1</sup> )                   | 92                                 | 77                |
| K <sub>2</sub> O (kg ha <sup>-1</sup> )                                | 80                                 | 110               |
| <b>Soil characteristics</b>                                            |                                    |                   |
| Sand (%)                                                               | 41.00                              |                   |
| Silt (%)                                                               | 20.00                              |                   |
| Clay (%)                                                               | 39.00                              |                   |
| Texture                                                                | Clay-Loam                          |                   |
| pH                                                                     | 7.52                               |                   |
| EC (mS cm <sup>-1</sup> )                                              | 1.19                               |                   |
| Organic carbon (%)                                                     | 1.33                               |                   |
| Total limestone (g kg <sup>-1</sup> )                                  | 19.30                              |                   |
| Organic matter (%)                                                     | 2.29                               |                   |
| Total N (%)                                                            | 0.17                               |                   |
| C/N ratio                                                              | 8.00                               |                   |
| Available P (mg kg <sup>-1</sup> )                                     | 10.60                              |                   |
| Exchangeable K (mg kg <sup>-1</sup> )                                  | 268.00                             |                   |
| Cation exchange capacity (meq 100 g <sup>-1</sup> )                    | 25.10                              |                   |
| Soil water content at field capacity (m <sup>3</sup> m <sup>-3</sup> ) | 0.344                              |                   |
| Soil water content at wilting point (m <sup>3</sup> m <sup>-3</sup> )  | 0.196                              |                   |

Legend: DAT = days after transplant, GDD = growing degree days.

**Table S2.** Eigenvalues, relative and cumulative proportion of total variance, and correlation coefficients for all data about the processing tomato crop subjected to two irrigation treatments (IRR = full-irrigation, RDI = regulated deficit irrigation), in the Years 2019 and 2020 with respect to the three principal components. FRW = average fruit weight, NFR = number of marketable fruits per plant, TY = total yield, MY = marketable yield, WY = unmarketable fruits, RY = rotten fruits, BERY = fruits affected by blossom-end rot, GY = unripe fruits, HI = harvest index, WPI = irrigation water productivity, EWP = economic water productivity, TDF = total defective fruits, SsF = sunscald fruits, CRACK = cracking fruits, VrF = fruits viral symptoms, pH, TtA = titratable acidity, SSC = soluble solids content, DM = fruit dry matter, SSC/TtA = soluble solids content-to-titratable acidity ratio, BrY = brix yield, Glc = glucose, Fru = fructose, Fru/Glc = fructose-to-glucose ratio, Suc = sucrose, Sta = starch, PP = poly-phenols, Lyc = lycopene, Prot = proteins, Ala = alanine, Arg = arginine, Asn = asparagine, Asp = aspartic acid, GABA =  $\gamma$ -aminobutyric acid, Gln = glutamine, Glu = glutamate, Gly = glycine, His = histidine, Ile = isoleucine, Leu = leucine, Lys = lysine, Met = methionine, MEA = monoethanolamine, Orn = ornithine, Phe = phenylalanine, Pro = proline, Ser = serine, Thr = threonine, Trp = tryptophan, Tyr = tyrosine, Val = valine, TAA = total amino acids, BCAA = branched amino acids, EAA = essential amino acids. Boldface factor loadings are considered highly weighed.

| Principal Components   | PC1          | PC2          | PC3         |
|------------------------|--------------|--------------|-------------|
| Eigenvalue             | 36.3         | 11.7         | 5.9         |
| Percentage of variance | 67.3         | 21.7         | 11.0        |
| Cumulative variance    | 67.3         | 89.0         | 100.0       |
| Eigen vectors          |              |              |             |
| Ala                    | 0.13         | <b>0.16</b>  | 0.12        |
| Arg                    | 0.14         | <b>0.17</b>  | 0.04        |
| Asn                    | -0.16        | -0.08        | 0.02        |
| Asp                    | -0.16        | 0.05         | 0.00        |
| BCAA                   | 0.09         | 0.24         | 0.03        |
| BERY                   | 0.16         | -0.03        | -0.05       |
| BrY                    | <b>-0.16</b> | -0.02        | 0.14        |
| CRACK                  | 0.11         | -0.12        | -0.27       |
| DM                     | <b>0.16</b>  | -0.06        | 0.11        |
| EAA                    | <b>0.16</b>  | 0.08         | -0.02       |
| EWP                    | -0.13        | -0.09        | 0.22        |
| Fru                    | 0.10         | -0.21        | 0.14        |
| Fru/Glc                | <b>-0.15</b> | 0.11         | -0.11       |
| FRW                    | 0.06         | 0.22         | 0.23        |
| GABA                   | 0.12         | 0.12         | -0.22       |
| Glc                    | 0.13         | <b>-0.16</b> | 0.11        |
| Gln                    | -0.10        | 0.23         | -0.03       |
| Glu                    | <b>-0.16</b> | 0.05         | -0.05       |
| Gly                    | <b>0.16</b>  | -0.01        | 0.07        |
| GY                     | -0.16        | 0.01         | -0.06       |
| HI                     | 0.16         | 0.04         | -0.02       |
| His                    | -0.07        | 0.14         | -0.32       |
| Ile                    | 0.06         | 0.27         | 0.08        |
| Leu                    | 0.12         | 0.20         | 0.01        |
| Lyc                    | <b>-0.17</b> | -0.01        | 0.00        |
| Lys                    | -0.13        | 0.18         | -0.03       |
| MEA                    | <b>-0.17</b> | 0.01         | -0.03       |
| Met                    | <b>0.16</b>  | 0.04         | -0.01       |
| MY                     | -0.16        | 0.01         | 0.05        |
| NFR                    | -0.17        | -0.02        | 0.00        |
| Orn                    | <b>0.15</b>  | 0.11         | -0.06       |
| pH                     | <b>-0.15</b> | -0.13        | 0.02        |
| Phe                    | <b>-0.16</b> | 0.07         | -0.02       |
| PP                     | 0.12         | <b>-0.21</b> | 0.00        |
| Pro                    | 0.13         | <b>-0.15</b> | 0.14        |
| Prot                   | -0.15        | 0.04         | <b>0.17</b> |
| RY                     | 0.15         | -0.08        | -0.12       |
| Ser                    | 0.05         | 0.22         | <b>0.23</b> |

|         |              |              |             |
|---------|--------------|--------------|-------------|
| SSC     | 0.14         | -0.11        | <b>0.15</b> |
| SSC/TtA | 0.08         | <b>-0.25</b> | -0.09       |
| SsF     | 0.12         | 0.00         | 0.27        |
| Sta     | 0.12         | -0.03        | -0.28       |
| Sucr    | -0.06        | -0.16        | 0.30        |
| TAA     | -0.14        | 0.16         | -0.03       |
| TDF     | <b>0.16</b>  | -0.08        | -0.08       |
| Thr     | <b>-0.15</b> | 0.10         | -0.08       |
| Trp     | 0.11         | 0.22         | 0.01        |
| TtA     | 0.05         | 0.20         | <b>0.28</b> |
| TY      | -0.17        | 0.00         | 0.02        |
| Tyr     | 0.15         | 0.12         | -0.09       |
| Val     | 0.09         | 0.25         | 0.01        |
| VrF     | <b>0.16</b>  | -0.07        | -0.09       |
| WPI     | -0.14        | -0.10        | 0.18        |
| WY      | -0.15        | -0.03        | -0.16       |

**Table S3.** Comparison between monthly average temperatures and rainfall totals from 2019-2020 and long-term historical data (1951-2018).

| Month  | Mean air temperature (°C) |       |       | Rainfall totals (mm) |       |       |
|--------|---------------------------|-------|-------|----------------------|-------|-------|
|        | 1951-2018                 | 2019  | 2020  | 1951-2018            | 2019  | 2020  |
| May    | 17.72                     | 14.88 | 17.78 | 39.41                | 64.00 | 17.20 |
| June   | 22.43                     | 25.13 | 22.30 | 33.29                | 00.00 | 33.00 |
| July   | 25.27                     | 26.25 | 25.16 | 24.58                | 38.00 | 8.20  |
| August | 25.33                     | 26.79 | 26.88 | 30.36                | 00.00 | 37.20 |
